# Supplementary material
Source: HighWire-hosted journal article supplement (https://bmjopen.bmj.com/content/12/8/e060458)
Supplement: inline-supplementary-material-1 [file inline-supplementary-material-1.pdf]

## Appendix A. Parameter estimation

**Table A1.** Hyperparameters used in the default model for variable selection. If a hyperparameter is not given, the default is used.

| <b>Model</b>               | <b>Parameter</b> | <b>Value</b> |
|----------------------------|------------------|--------------|
| <b>Logistic regression</b> | max_iter         | 5000         |
|                            | penalty          | None         |
| <b>Random Forest</b>       | max_depth        | 10           |
|                            | n_estimators     | 200          |
|                            | min_samples_leaf | 20           |
|                            |                  |              |
| <b>XGBoost</b>             | eta              | 0.1          |
|                            | gamma            | 0.1          |
|                            | min_child_weight | 7            |
|                            | n_estimators     | 200          |
|                            | colsample_bytree | 0.8          |
|                            | max_depth        | 5            |
|                            | reg_alpha        | 1            |
|                            | subsample        | 0.9          |

**Table A2.** Grid search parameters per algorithm. If a hyperparameter is not given, the default is used. The selected values are shown per algorithm and per dataset (in order from dataset 1 to 6). All searched values are additionally given.

| <b>Model</b>               | <b>Parameters</b>           |                 | <b>Selected values for six datasets</b> | <b>Searched values</b>   |
|----------------------------|-----------------------------|-----------------|-----------------------------------------|--------------------------|
| <b>Logistic regression</b> | <b>penalty = elasticnet</b> | <b>C</b>        | 0.01, 0.01, 0.1, 0.1, 0.1, 0.01         | 0.01, 0.1, 1, 10, 100    |
|                            |                             | <b>l1_ratio</b> | 0.2, 0, 0, 0, 0, 0                      | 0, 0.2, 0.4, 0.6, 0.8, 1 |
|                            |                             | <b>max_iter</b> | 5000                                    | 5000                     |
|                            |                             | <b>solver</b>   | saga                                    | saga                     |
|                            | <b>penalty = None</b>       | <b>solver</b>   | -, -, -, -, -                           | lbfgs, saga              |
|                            |                             | <b>max_iter</b> | -                                       | 5000                     |
| <b>Random Forest</b>       | <b>max_depth</b>            |                 | 3, 20, 20, 20, none, 20                 | 3, 5, 7, 10, 20, None    |
|                            | <b>max_features</b>         |                 | auto, auto, auto, auto, auto, auto      | auto, sqrt               |
|                            | <b>min_samples_leaf</b>     |                 | 8, 4, 4, 8, 8, 8                        | 1, 2, 4, 8               |
|                            | <b>min_samples_split</b>    |                 | 2, 5, 10, 5, 5, 2                       | 2, 5, 10                 |
|                            | <b>n_estimators</b>         |                 | 1000, 2000, 2000, 1000, 1000, 600       | 200, 600, 1000, 2000     |
| <b>XGBoost</b>             | <b>eta</b>                  |                 | 0.2, 0.1, 0.1, 0.1, 0.1, 0.1            | 0.01, 0.1, 0.2           |
|                            | <b>max_depth</b>            |                 | 5, 3, 3, 3, 3, 3                        | 3, 5, 8                  |
|                            | <b>min_child_weight</b>     |                 | 7, 9, 5, 9, 9, 9                        | 5, 7, 9                  |
|                            | <b>gamma</b>                |                 | 0, 0.2, 0.1, 0.1, 0.2, 0.2              | 0, 0.1, 0.2              |
|                            | <b>reg_alpha</b>            |                 | 1e-05, 0.1, 1e-05, 0.1, 0.1, 0.1        | 1e-05, 0.1               |
|                            | <b>subsample</b>            |                 | 0.9                                     | 0.9                      |
|                            | <b>colsample_bytree</b>     |                 | 0.8                                     | 0.8                      |
|                            | <b>n_estimators</b>         |                 | 300                                     | 300                      |

**Table A3.** Selected variables per model in order for the extended non-sequential dataset and the complete dataset using logistic regression. For the complete dataset, trends are included, which consist of multiple codes which co-occur ('together with') or occur after each other ('followed by'). Furthermore, lab values in trends can be 'low', 'high' or 'normal', indicating an in- or decrease with respect to the last measurement (not the absolute value).

| <b>Included at step</b> | <b>Extended non-sequential dataset</b>    | <b>Complete dataset</b>                                                   |
|-------------------------|-------------------------------------------|---------------------------------------------------------------------------|
| <b>#1</b>               | Age                                       | Age                                                                       |
| <b>#2</b>               | Antithrombotic agents                     | Antithrombotic agents                                                     |
| <b>#3</b>               | Drugs for obstructive airway diseases     | Drugs for obstructive airway diseases                                     |
| <b>#4</b>               | Diuretics                                 | Diuretics                                                                 |
| <b>#5</b>               | Chronic atrialfibrillation                | Chronic atrialfibrillation                                                |
| <b>#6</b>               | Chronic diabetes mellitus                 | Chronic diabetes mellitus                                                 |
| <b>#7</b>               | Chronic non-rheumatic valve disease       | Chronic non-rheumatic valve disease                                       |
| <b>#8</b>               | Beta blocking agents                      | Low albumine urine                                                        |
| <b>#9</b>               | Chronic COPD                              | Beta blocking agents                                                      |
| <b>#10</b>              | Tested triglycerides                      | Chronic COPD                                                              |
| <b>#11</b>              | Chronic dyspnea                           | Chronic dyspnea                                                           |
| <b>#12</b>              | RAAS drugs                                | RAAS drugs                                                                |
| <b>#13</b>              | Cardiac therapy drugs                     | Cardiac therapy drugs                                                     |
| <b>#14</b>              | Chronic gout                              | Sufficient physical exercise                                              |
| <b>#15</b>              | Tested BNP                                | Chronic other diseases urinary tract                                      |
| <b>#16</b>              | Chronic other disease peripheral arteries | GP visit 2-3 month                                                        |
| <b>#17</b>              | GP visit 2-3 month                        | Gender                                                                    |
| <b>#18</b>              | Chronic myocardial infarct                | Tested BNP                                                                |
| <b>#19</b>              | Chronic other diseases urinary tract      | Chronic other disease peripheral arteries                                 |
| <b>#20</b>              | Gender                                    | Chronic senile dementia                                                   |
| <b>#21</b>              | Chronic senile dementia                   | Chronic (diabetes) ulcer                                                  |
| <b>#22</b>              | Chronic (diabetes) ulcer                  | RAAS drugs followed by normal diastolic BP followed by normal systolic BP |
| <b>#23</b>              | Tested ferritine                          | High LDL cholesterol                                                      |
| <b>#24</b>              | Made follow up appointment for smoking    | High weight                                                               |
| <b>#25</b>              | Multivitamins                             | Chronic myocardial infarct                                                |
| <b>#26</b>              | Ankle oedema                              | Tested ferritine                                                          |
| <b>#27</b>              | Lipid modifying agents                    | Lipid modifying agents                                                    |
| <b>#28</b>              | Advice given to stop smoking              | Normal cholesterol followed by normal diastolic BP                        |
| <b>#29</b>              | Mineral supplements                       | Antibacterials for systemic use followed by eGFR                          |

|            |                                                 |                                                                                               |
|------------|-------------------------------------------------|-----------------------------------------------------------------------------------------------|
| <b>#30</b> | Chronic hypertension                            | Calcium channel blockers followed by diabetic mellitus                                        |
| <b>#31</b> | Tested diastolic BP                             | Made follow up appointment for smoking                                                        |
| <b>#32</b> | Chronic gonartrosis                             | Multivitamins                                                                                 |
| <b>#33</b> | Pneumonia                                       | Mineral supplements                                                                           |
| <b>#34</b> | Chronic anemia                                  | Advice given to stop smoking                                                                  |
| <b>#35</b> | Tested vitamine B12                             | Chronic gout                                                                                  |
| <b>#36</b> | Tested albumine blood                           | High systolic BP followed by normal diastolic BP                                              |
| <b>#37</b> | Tested amount of dyspnea                        | High systolic BP followed by low diastolic BP together with low systolic BP                   |
| <b>#38</b> | Fatigue                                         | Drugs for obstructive airway diseases together with COPD                                      |
| <b>#39</b> | Chronic arthrosis                               | Low sodium                                                                                    |
| <b>#40</b> | Chronic peripheral neuropatie                   | RAAS drugs followed by low albumin / creatinine ratio                                         |
| <b>#41</b> | Chronic overall decline                         | Diuretics together with beta blocking agents                                                  |
| <b>#42</b> | Complaints foot or leg                          | Diuretics together with chronic hypertension                                                  |
| <b>#43</b> | Tested diabetic retinopathy left eye            | Antithrombotic agents together with beta blocking agents together with lipid modifying agents |
| <b>#44</b> | Asked claudicatio complaints                    | Low potassium                                                                                 |
| <b>#45</b> | Tested glucose with timestamp                   | RAAS drugs followed by normal systolic BP followed by low diastolic BP                        |
| <b>#46</b> | Drugs for functional gastrointestinal disorders | Ankle oedema                                                                                  |
| <b>#47</b> | Asked seksual disorder                          | Tested vitamine B12                                                                           |
| <b>#48</b> | Chronic ischemic heart disease                  | Low diastolic BP together with essential hypertension                                         |
| <b>#49</b> | Back complaints                                 | Calcium channel blockers followed by high systolic BP                                         |
| <b>#50</b> | Analgesics                                      | Chronic anemia                                                                                |
| <b>#51</b> | Tested glycohemoglobin                          | Tested amount of dyspnea                                                                      |
| <b>#52</b> | GP visit 1-2 month                              | Chronic gonartrosis                                                                           |
| <b>#53</b> | Tested aspartateaminotransferasis               | RAAS drugs followed by lipid modifying agents                                                 |
| <b>#54</b> | Nasal preparations                              | Beta blocking agents followed by normal diastolic BP together with normal systolic BP         |
| <b>#55</b> | Upper airway infection                          | Antithrombotic agents followed by normal LDL cholesterol                                      |
| <b>#56</b> | Fat metabolism disorder                         | Tested aspartateaminotransferasis                                                             |
| <b>#57</b> | Chronic constitutional eczema                   | Normal systolic BP together with regular pulse rhythm                                         |
| <b>#58</b> | Tested weight at QI = 25                        | Antithrombotic agents followed by normal creatinine followed by normal systolic BP            |
| <b>#59</b> | Chronic other skin diseases                     | Tested albumine blood                                                                         |
| <b>#60</b> | Written down particularities diet               | Normal height patient followed by normal weight patient                                       |
| <b>#61</b> | Tested risk footulcer                           | Tested diabetic retinopathy left eye                                                          |
| <b>#62</b> | Chronic presbyacusic                            | Drugs for functional gastrointestinal disorders                                               |

|            |                                            |                                                                                              |
|------------|--------------------------------------------|----------------------------------------------------------------------------------------------|
| <b>#63</b> | Asked for side-effects medication diabetes | RAAS drugs followed by normal HDL cholesterol                                                |
| <b>#64</b> | Chronic genetic diseases extremities       | RAAS drugs followed by low systolic BP followed by normal systolic BP                        |
| <b>#65</b> | Chronic reumatoid atrisis                  | Diuretics followed by normal systolic BP                                                     |
| <b>#66</b> | Contact emphysema                          | Diuretics followed by normal creatinine                                                      |
| <b>#67</b> | Asked about alcohol usage                  | High height patient followed by normal weight patient                                        |
| <b>#68</b> | Amputation right foot                      | Antithrombotic agents followed by normal systolic BP followed by normal BMI                  |
| <b>#69</b> | Ulcers left foot                           | Normal glycohemoglobin followed by normal BMI                                                |
| <b>#70</b> | Amputation left foot                       | Fatigue                                                                                      |
| <b>#71</b> | Tested monofilaments right foot            | Asked the amount of physical exercise                                                        |
| <b>#72</b> | Tested HDL cholesterol                     | Lipid modifying agents followed by low glucose                                               |
| <b>#73</b> | Chronic iron deficiency anemia             | Antithrombotic agents followed by drugs for constipation                                     |
| <b>#74</b> | Lower back pain                            | Chronic ischemic heart disease                                                               |
| <b>#75</b> | Tested blood sediment                      | Asked for sexual disorders                                                                   |
| <b>#76</b> | Malignancy skin                            | Drugs for acid related disorders together with calcium channel blockers                      |
| <b>#77</b> | Given advice weightreduction               | Lipid modifying agents followed by normal systolic BP followed by normal diastolic BP        |
| <b>#78</b> | Tested monofilaments left foot             | Lipid modifying agents followed by normal weight patient followed by normal BMI              |
| <b>#79</b> | Control visit DM type 2                    | Analgesics                                                                                   |
| <b>#80</b> | Chronic cataract                           | Normal diastolic BP together with normal systolic BP followed by normal diastolic BP         |
| <b>#81</b> | Chronic seborroic eczema                   | High potassium together with normal creatinine                                               |
| <b>#82</b> | Angina pectoris (comorbidity)              | Complaints foot or leg                                                                       |
| <b>#83</b> | Asked for chest pain                       | Normal cholesterol together with normal creatinine                                           |
| <b>#84</b> | Thyroid therapy                            | Normal cholesterol followed by normal weight patient                                         |
| <b>#85</b> | Tested ureaDrugs do                        | Beta blocking agents followed by high diastolic BP                                           |
| <b>#86</b> | Tested red blood cell distribution width   | Antithrombotic agents followed by low BMI                                                    |
| <b>#87</b> | Angina pectoris                            | GP visit 1-2 month                                                                           |
| <b>#88</b> |                                            | Low BMI followed by diabetes mellitus                                                        |
| <b>#89</b> |                                            | Normal systolic BP together with diabetes mellitus                                           |
| <b>#90</b> |                                            | Normal systolic BP followed by normal systolic BP together with diabetes mellitus            |
| <b>#91</b> |                                            | Asked for claudicatio complaints                                                             |
| <b>#92</b> |                                            | Low albumin urine together with low albumin / creatinine ratio urine                         |
| <b>#93</b> |                                            | Drugs for acid related disorders followed by diabetes mellitus followed by diabetes mellitus |
| <b>#94</b> |                                            | Chronic arthrosis                                                                            |
| <b>#95</b> |                                            | Antithrombotic agents followed by drugs for acid related disorders                           |

|             |                                                                                                        |
|-------------|--------------------------------------------------------------------------------------------------------|
| <b>#96</b>  | Normal weight patient followed by normal height patient                                                |
| <b>#97</b>  | Drugs for acid related disorders together with chronic diabetes mellitus followed by diabetes mellitus |
| <b>#98</b>  | Antithrombotic agents followed by normal systolic BP followed by diabetes mellitus                     |
| <b>#99</b>  | Low systolic BP followed by low diastolic BP                                                           |
| <b>#100</b> | Low systolic BP followed by low systolic BP                                                            |
