# Supplementary material
Source: HighWire-hosted journal article supplement (https://bmjopen.bmj.com/content/12/8/e060458)
Supplement: inline-supplementary-material-2 [file inline-supplementary-material-2.pdf]

## Appendix B. Confusion matrices

**Table B1.** Confusion matrix for the logistic regression model, demographic dataset

|                  | <b>Prediction = 0</b> | <b>Prediction = 1</b> |       |
|------------------|-----------------------|-----------------------|-------|
| <b>Label = 0</b> | 51681                 | 25224                 | 76905 |
| <b>Label = 1</b> | 654                   | 1055                  | 1709  |
|                  | 52335                 | 26279                 |       |

**Table B2.** Confusion matrix for the logistic regression model, extended non-sequential dataset

|                  | <b>Prediction = 0</b> | <b>Prediction = 1</b> |       |
|------------------|-----------------------|-----------------------|-------|
| <b>Label = 0</b> | 50220                 | 26685                 | 76905 |
| <b>Label = 1</b> | 409                   | 1300                  | 1709  |
|                  | 50629                 | 27985                 |       |

**Table B3.** Confusion matrix for the logistic regression model, complete dataset

|                  | <b>Prediction = 0</b> | <b>Prediction = 1</b> |       |
|------------------|-----------------------|-----------------------|-------|
| <b>Label = 0</b> | 48813                 | 28092                 | 76905 |
| <b>Label = 1</b> | 394                   | 1315                  | 1709  |
|                  | 49207                 | 29406                 |       |
